# Supplementary material
Source: Springer Nature journal article supplement (https://www.springermedizin.de/resource/supplementary/12904_2009_83_MOESM2_ESM.pdf/9518064)

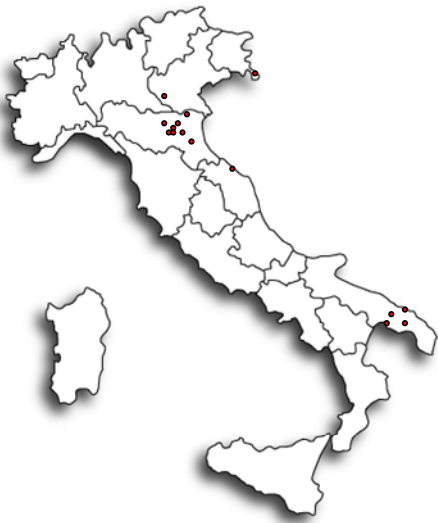

**1988**  
(1982-1987)

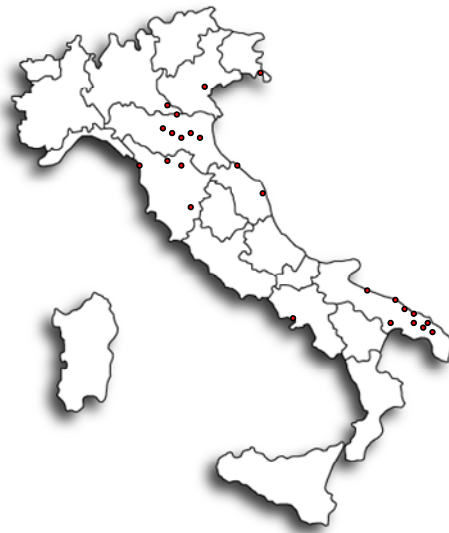

**1998**  
(1988-1997)

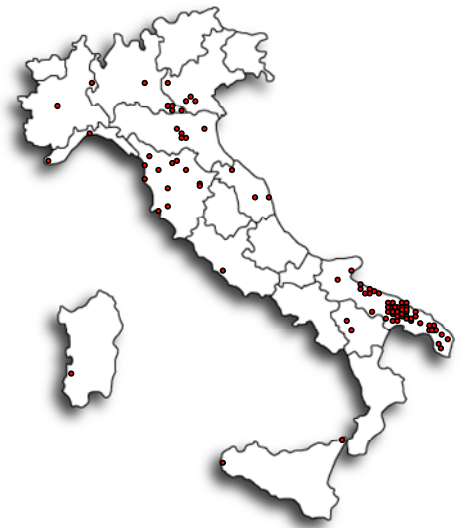

**2008**  
(1998-2007)

Supplement: MOESM2 [file 9518064]
